# Supplementary material
Source: Elsevier journal article supplement (https://www.sciencedirect.com/science/article/pii/S2529912322000675)
Supplement: mmc1 [file S2529912322000675:mmc1.docx]

**Tabla Suplementaria 1. Estatina a la inclusión en el Registro en sujetos prevención primaria y secundaria**

| **Estatina** | **Primaria**  **N = 2539** | **Secundaria**  **N = 453** |  |
| --- | --- | --- | --- |
| Atorvastatina, % [n] | 40,0 [1015] | 55,2 [250] | <0,001 |
| Simvastatina, % [n] | 22,7 [576] | 6,2 [28] |
| Rosuvastatina, % [n] | 28,9 [735] | 33,6 [152] |
| Fluvastatina, % [n] | 0,75 [19] | 0,2 [1] |
| Pitavastatina, % [n] | 4,1 [105] | 2,6 [12] |
| Pravastatina, % [n] | 3,5 [89] | 2,2 [10] |

**Tabla Suplementaria 2 Combinaciones de fármacos hipolipemiantes a la inclusión en el Registro en prevención primaria y secundaria**

| **Tipo combinación** | **Primaria**  **N = 3439** | **Secundaria**  **N = 519** | **Total** | **P** |
| --- | --- | --- | --- | --- |
| Estatinas + Ezetimiba, % [n] | 19,6 [673] | 50,9 [264] | 937 | <0,001 |
| Atorvastatina + Ezetimiba, % [n] | 41,9 [282] | 52,6 [139] | 421 | <0,001 |
| Simvastatina + Ezetimiba, % [n] | 16,9 [114] | 4,9 [13] | 127 |
| Rosuvastatina + Ezetimiba, % [n] | 33,5 [226] | 36,7 [97] | 323 |
| Fluvastatina + Ezetimiba, % [n] | 0,9 [6] | 0 | 6 |
| Pitavastatina + Ezetimiba, % [n] | 4,3 [29] | 3,4 [9] | 38 |
| Pravastatina + Ezetimiba, % [n] | 1,2 [8] | 1,5 [4] | 12 |
| Estatinas + Fenofibrato, % [n] | 6,6 [219] | 7,1 [37] | 256 | <0,238 |
| Atorvastatina + Fenofibrato, % [n] | 32,0 [73] | 51,3 [19] | 92 | <0,001 |
| Simvastatina + Fenofibrato, % [n] | 17,5 [40] | 8,1 [3] | 43 |
| Rosuvastatina + Fenofibrato, % [n] | 17,9 [41] | 27,0 [10] | 51 |
| Pitavastatina + Fenofibrato, % [n] | 4,4 [10] | 2,7 [1] | 11 |
| Pravastatina + Fenofibrato, % [n] | 24,1 [55] | 10,8 [4] | 59 |

**Tabla Suplementaria 3. Dosis media (desviación standard) de estatinas en la inclusión en el Registro en sujetos en prevención primaria y secundaria.**

|  |  | **Primaria** | **Secundaria** | **P** |
| --- | --- | --- | --- | --- |
| **Estatinas** | **N** |  |  |  |
| Atorvastatina, mg/día | 1265 | 35,2 (±20,8) | 53,5 (±24,7) | <0,001 |
| Rosuvastatina, mg/día | 887 | 14,4 (±8,0) | 21,2 (±8,7) | <0,001 |
| Simvastatina, mg/día | 604 | 27,5 (±11,2) | 35,6 (±9,2) | <0,001 |
| Pitavastatina, mg/día | 117 | 2,7 (±12) | 2,8 (±1,2) | 0,800 |
| Pravastatina, mg/día | 99 | 33,8 (±11,1) | 38,0 (±6,3) | 0,091 |
| Fluvastatina, mg/día | 20 | 68,7 (±20,6) | 80 | 0,604 |

**Tabla Suplementaria 4. Características bioquímicas al inicio del seguimiento dependiendo si han tenido evento cardiovascular durante el seguimiento.**

|  | **ECV NO**  **n= 1623** | **ECV SÍ**  **n= 42** | **P** |
| --- | --- | --- | --- |
| Colesterol total (mg/dL) | 198 (170-234) | 192 (153-218) | 0,115 |
| Triglicéridos (mg/dL) | 121 (89,0-179) | 131 (92,0-163) | 0,726 |
| cHDL (mg/dL) | 53,0 (44,0-65,0) | 50,0 (41,0-60,0) | 0,041 |
| cLDL (mg/dL) | 111 (87,4-144) | 109 (76,0-128) | 0,263 |
| No-cHDL (mg/dL) | 142 (115-177) | 135 (103-170) | 0,208 |
| Glucosa (mg/dL) | 96,0 (88,0-107) | 100 (92,0-125) | 0,058 |

Los datos cuantitativos expresados con intervalos (mediana - rango intercuartílico); cHDL: colesterol unido a lipoproteínas de alta densidad, cLDL: colesterol unido a lipoproteínas de baja densidad. ECV: evento cardiovascular.

**Tabla Suplementaria 5. Tratamiento hipolipemiante al inicio del seguimiento dependiendo si han tenido evento cardiovascular durante el seguimiento.**

|  | **ECV NO**  **n=1552** | **ECV SÍ**  **n=41** | **P** |
| --- | --- | --- | --- |
| No tratamiento, n (%) | 198 (12,5) | 1 (2,40) | 0,043 |
| Estatina baja potencia, n (%) | 20 (1,30) | 0 |
| Estatina baja potencia + ezetimiba, n (%) | 30 (1,90) | 0 |
| Estatina media potencia, n (%) | 573 (36,2) | 14 (33,3) |
| Estatina media potencia + ezetimiba, n (%) | 136 (8,60) | 7 (16,7) |
| Estatina alta potencia, n (%) | 212 (13,4) | 5 (11,9) |
| Estatina alta potencia + ezetimiba, n (%) | 185 (11,7) | 11 (26,2) |
| Estatinas + fibratos, n (%) | 110 (7,00) | 1 (2,40) |
| Fibratos, n (%) | 27 (1,70) | 0 |
| iPCSK9, n (%) | 20 (1,30) | 2 (4,80) |
| Otros, n (%) | 41 (2,60) | 0 |

Inhibidores PCSK9: iPCSK9; ECV: evento cardiovascular.
